# Supplementary material for: Distinct Elevational Patterns and Their Linkages of Soil Bacteria and Plant Community in An Alpine Meadow of the Qinghai–Tibetan Plateau
Source: MDPI journal article supplement (doi:10.3390/microorganisms10051049), 2022-05-19
Supplement: s1 [file s1]

## Supplementary Materials

# Distinct Elevational Patterns and Their Linkages of Soil Bacteria and Plant Community in An Alpine Meadow of the Qinghai–Tibetan Plateau

Jing Cong <sup>1</sup>, Wei Cong <sup>2</sup>, Hui Lu <sup>2</sup> and Yuguang Zhang <sup>2,\*</sup>

<sup>1</sup> College of Marine Science and Biological Engineering, Qingdao University of Science Technology, Qingdao 266042, China; yqdh77@163.com

<sup>2</sup> Institute of Forest Ecology, Environment and Protection, Chinese Academy of Forestry and the Key Laboratory of Biological Conservation of State Forestry Administration, Beijing 100091, China; cong0915wei@163.com (W.C.); susanluhui@163.com (H.L.)

\* Correspondence: yugzhang@sina.com.cn; Tel./Fax: +86-01062888594

**Table S1.** The climate and soil physicochemical characteristics in all six study sites

| Environmental Factors                               | SJY-4790       | SJY-4480        | SJY-4140      | SJY-3880      | SJY-3490      | SJY-3220      |
|-----------------------------------------------------|----------------|-----------------|---------------|---------------|---------------|---------------|
| Mean annual temperature of the warmest quarter (°C) | 4.90           | 6.20            | 6.30          | 7.40          | 10.00         | 11.60         |
| Mean annual precipitation (mm)                      | 417.00         | 386.00          | 372.00        | 354.00        | 344.00        | 319.00        |
| Soil moisture (%)                                   | 40.42±5.74a    | 38.12±8.18a     | 28.88±4.44b   | 20.13±3.48c   | 17.84±3.81cd  | 14.34±5.41d   |
| pH                                                  | 6.21±0.30e     | 6.65±0.28d      | 7.38±0.12c    | 7.54±0.09b    | 7.72±0.07a    | 7.75±0.05a    |
| Soil organic carbon (SOC) (g/kg)                    | 79.25±15.21a   | 68.06±21.65b    | 62.57±12.17b  | 42.51±8.96c   | 25.09±3.76d   | 23.82±2.37d   |
| Total nitrogen (TN) (g/kg)                          | 6.47±1.33a     | 5.69±1.50b      | 5.67±0.73b    | 3.85±0.49c    | 2.61±0.35d    | 2.81±0.16d    |
| SOC/ TN ratio                                       | 12.29±0.93a    | 11.82±1.12ab    | 10.99±.11b    | 11.12±2.45b   | 9.62±0.61c    | 8.47±0.49d    |
| Total phosphorus (TP) (g/kg)                        | 0.64±0.17ab    | 0.61±0.06ab     | 0.67±0.12a    | 0.58±0.05b    | 0.45±0.02c    | 0.51±0.03bc   |
| Available N (mg/kg)                                 | 509.62±111.32a | 463.62±132.59ab | 410.03±61.73b | 287.98±41.78c | 204.04±40.43d | 181.68±15.46d |
| Available P (mg/kg)                                 | 26.33±8.09b    | 18.81±3.29c     | 39.02±19.12a  | 29.14±5.96b   | 8.46±2.67d    | 20.67±3.22c   |
| NH <sub>4</sub> <sup>+</sup> -N (mg/kg)             | 11.62±8.64a    | 11.20±8.38a     | 6.56±1.88b    | 5.54±1.57b    | 4.89±1.39b    | 5.87±1.85b    |
| NO <sub>3</sub> <sup>-</sup> -N (mg/kg)             | 61.49±31.98a   | 43.51±7.29b     | 53.54±11.54ab | 36.98±10.10b  | 39.49±11.74b  | 31.61±13.38b  |

Data present the mean value and standard error. Significant differences among study sites are indicated by alphabetic letters.  $P < 0.05$ .

**Table S2.** Soil bacterial richness at the phylum level at six study sites

| Phylum           | SJY-4790               | SJY-4480               | SJY-4140               | SJY-3880               | SJY-3490              | SJY-3220               |
|------------------|------------------------|------------------------|------------------------|------------------------|-----------------------|------------------------|
| Proteobacteria   | 1060.69±71.75d         | 1005.00±63.30cd        | 992.62±69.48c          | 863.54±81.81a          | 934.08±70.61b         | 883.69±103.45ab        |
| Acidobacteria    | 618.69±86.85a          | 651.77±60.30a          | 625.77±80.78a          | 637.69±69.12a          | 735.00±42.90b         | 732.77±65.93b          |
| Actinobacteria   | 367.62±36.72a          | 396.31±61.24a          | 567.54±79.67b          | 573.85±66.16b          | 623.77±63.79bc        | 651.69±141.29c         |
| Verrucomicrobia  | 275.54±2.79c           | 208.69±18.35b          | 200.00±14.89b          | 175.23±26.25a          | 195.62±21.57b         | 177.08±20.75a          |
| Bacteroidetes    | 357.23±46.67d          | 291.00±40.05c          | 264.62±46.88bc         | 238.54±40.92ab         | 243.85±29.75ab        | 217.46±32.78a          |
| Planctomycetes   | 125.08±18.43a          | 137.77±17.05a          | 162.08±16.25b          | 154.85±20.29b          | 179.38±18.51c         | 188.69±34.53c          |
| Chloroflexi      | 51.92±6.06b            | 48.08±5.01ab           | 48.54±7.04ab           | 42.85±8.63a            | 60.38±10.70c          | 55.15±13.13bc          |
| Firmicutes       | 55.62±8.95a            | 64.31±8.60b            | 82.69±9.29c            | 79.15±8.85c            | 96.15±11.43d          | 92.85±17.19d           |
| Crenarchaeota    | 10.00±2.80a            | 10.85±2.44a            | 14.54±2.93b            | 15.85±2.38bc           | 17.38±1.98c           | 19.92±3.04d            |
| Cyanobacteria    | 14.54±5.36b            | 13.23±6.19ab           | 10.23±4.07a            | 16.77±4.40b            | 21.00±5.72c           | 20.85±6.18c            |
| Gemmatimonadetes | 21.15±7.70a            | 23.69±6.36ab           | 20.92±3.55a            | 25.85±4.06ab           | 20.46±5.25a           | 28.38±12.77b           |
| Nitrospira       | 6.23±2.74a             | 7.38±2.50a             | 7.00±2.61a             | 7.23±2.49a             | 9.69±1.32b            | 10.15±1.77b            |
| Armatimonadetes  | 19.38±4.72b            | 19.38±3.97b            | 14.92±3.09a            | 17.46±5.88ab           | 26.92±7.16c           | 28.85±4.81c            |
| BRC1             | 3.77±1.24a             | 3.08±1.61a             | 3.23±0.93a             | 2.92±1.32a             | 5.62±2.43b            | 4.92±2.14b             |
| Chlorobi         | 1.46±0.88a             | 2.15±1.14a             | 1.92±1.19a             | 1.85±1.34a             | 1.84±0.90a            | 1.92±1.44a             |
| WS3              | 7.69±2.02c             | 6.00±1.58b             | 2.15±0.99a             | 2.53±1.33a             | 2.85±1.68a            | 2.62±1.04a             |
| Chlamydiae       | 4.08±2.87b             | 2.85±1.77b             | 1.54±1.56a             | 0.46±0.66a             | 0.77±1.24a            | 0.62±0.87a             |
| OD1              | 2.69±1.75c             | 2.23±1.64bc            | 1.62±1.33ab            | 1.15±1.21a             | 1.38±0.65ab           | 1.38±1.12ab            |
| <b>Total</b>     | <b>3292.38±157.16a</b> | <b>3186.92±170.78a</b> | <b>3299.54±169.64a</b> | <b>3144.23±214.65a</b> | <b>3516.85±153.0b</b> | <b>3472.46±310.75b</b> |

Data present the mean value and standard error. Significant differences among study sites are indicated by alphabetic letters.  $P < 0.05$ .

**Table S3.** Soil bacterial relative abundance of dominant (> 0.10%) classes at six study sites

| Phylum           | Class                       | SJY-4790 | SJY-4480 | SJY-4140 | SJY-3880 | SJY-3490 | SJY-3220 |
|------------------|-----------------------------|----------|----------|----------|----------|----------|----------|
| Proteobacteria   | Alphaproteobacteria         | 15.85    | 16.83    | 20.07    | 19.87    | 17.28    | 18.02    |
|                  | Betaproteobacteria          | 7.11     | 6.41     | 3.86     | 3.18     | 2.78     | 2.76     |
|                  | Gammaproteobacteria         | 10.38    | 9.15     | 7.21     | 4.49     | 4.32     | 3.49     |
|                  | Deltaproteobacteria         | 1.55     | 1.55     | 1.10     | 1.12     | 1.60     | 1.52     |
| Acidobacteria    | Acidobacteria_Gp3           | 0.16     | 0.09     | 0.12     | 0.11     | 0.22     | 0.31     |
|                  | Acidobacteria_Gp4           | 7.67     | 8.23     | 8.52     | 10.32    | 11.27    | 11.78    |
|                  | Acidobacteria_Gp6           | 9.74     | 13.11    | 10.35    | 11.77    | 12.21    | 11.79    |
|                  | Acidobacteria_Gp7           | 1.06     | 1.03     | 0.74     | 0.92     | 1.16     | 1.12     |
|                  | Acidobacteria_Gp10          | 0.11     | 0.25     | 0.53     | 0.58     | 0.95     | 1.12     |
|                  | Acidobacteria_Gp16          | 2.10     | 2.49     | 2.54     | 2.43     | 2.49     | 2.51     |
|                  | Acidobacteria_Gp17          | 0.96     | 1.26     | 0.87     | 0.73     | 0.56     | 0.50     |
|                  | Acidobacteria_Gp22          | 0.17     | 0.17     | 0.02     | 0.03     | 0.01     | 0.00     |
|                  | Acidobacteria_Gp25          | 0.17     | 0.14     | 0.10     | 0.11     | 0.25     | 0.20     |
| Verrucomicrobia  | Verrucomicrobiae            | 0.53     | 0.50     | 0.70     | 0.35     | 0.40     | 0.28     |
|                  | Spartobacteria              | 11.41    | 8.35     | 7.45     | 7.16     | 5.92     | 5.37     |
|                  | Subdivision3                | 0.78     | 0.54     | 0.33     | 0.33     | 0.58     | 0.39     |
|                  | Opitutae                    | 0.16     | 0.10     | 0.15     | 0.14     | 0.22     | 0.20     |
| Bacteroidetes    | Sphingobacteria             | 7.87     | 5.45     | 4.44     | 3.79     | 3.71     | 3.17     |
|                  | Flavobacteria               | 1.66     | 1.30     | 0.81     | 0.31     | 0.21     | 0.16     |
|                  | Bacteroidetes incertaesedis | 0.32     | 0.34     | 0.70     | 0.99     | 0.91     | 0.75     |
| Actinobacteria   | Actinobacteria              | 9.21     | 10.50    | 17.85    | 19.17    | 16.96    | 18.98    |
| Planctomycetes   | Planctomycetacia            | 1.08     | 1.19     | 1.35     | 1.15     | 1.59     | 1.36     |
|                  | Phycisphaerae               | 0.00     | 0.00     | 0.05     | 0.06     | 0.09     | 0.10     |
| Firmicutes       | Bacilli                     | 0.60     | 0.80     | 1.33     | 1.14     | 1.81     | 1.97     |
| Cyanobacteria    | Chloroplast                 | 0.25     | 0.11     | 0.08     | 0.24     | 0.20     | 0.24     |
| /Chloroplast     | Cyanobacteria               | 0.10     | 0.15     | 0.21     | 0.27     | 0.51     | 0.41     |
| Crenarchaeota    | Thermoprotei                | 0.64     | 1.32     | 1.66     | 1.76     | 2.00     | 1.88     |
| Gemmatimonadetes | Gemmatimonadetes            | 0.43     | 0.53     | 0.46     | 0.68     | 0.46     | 0.62     |
| Chloroflexi      | Anaerolineae                | 0.42     | 0.45     | 0.27     | 0.21     | 0.25     | 0.21     |
|                  | Caldilineae                 | 0.03     | 0.04     | 0.10     | 0.06     | 0.07     | 0.05     |
| Nitrospira       | Nitrospira                  | 0.29     | 0.37     | 0.11     | 0.17     | 0.28     | 0.34     |

**Table S4.** The soil microbial functional gene relative abundance at different functional gene categories in all six sites

| Gene Category                               | Gene Name | SJY-4790      | SJY-4480                           | SJY-4140      | SJY-3880      | SJY-3490                          | SJY-3220                          |
|---------------------------------------------|-----------|---------------|------------------------------------|---------------|---------------|-----------------------------------|-----------------------------------|
| <b>P cycling</b>                            | Ppx       | 661.08±132.19 | 702.52±72.62                       | 678.38±180.55 | 733.85±115.90 | 766.81±186.92 ( <i>P</i> = 0.080) | 780.61±184.97 ( <i>P</i> = 0.040) |
|                                             | Ppk       | 222.73±47.79  | 232.42±29.30                       | 225.06±58.34  | 258.60±52.72  | 252.84±64.82                      | 266.03±69.70( <i>P</i> =0.050)    |
|                                             | phytase   | 98.26±24.12   | 99.39±12.17                        | 98.52±25.23   | 108.77±17.99  | 111.29±29.72                      | 112.64±25.46                      |
| <b>N cycling</b>                            | nifH      | 49.61±9.78    | 53.06±7.57                         | 51.26±14.13   | 54.48±9.19    | 56.85±14.49                       | 60.11±13.53 ( <i>P</i> =0.026)    |
| N fixation                                  |           |               |                                    |               |               |                                   |                                   |
| Nitrification                               | amoA      | 299.75±31.19  | 324.44±40.03                       | 304.25±54.64  | 340.83±60.08  | 347.26±82.38 ( <i>P</i> =0.053)   | 347.73±82.38 ( <i>P</i> =0.050)   |
|                                             | hao       | 121.68±29.39  | 124.80±21.71                       | 125.63±29.19  | 135.97±34.62  | 151.76±39.36 ( <i>P</i> =0.015)   | 142.28±27.36 ( <i>P</i> =0.092)   |
| Denitrification                             | nosZ      | 192.77±38.56  | 212.52±30.76                       | 203.28±61.37  | 231.99±47.57  | 241.61±65.53 ( <i>P</i> =0.025)   | 246.74±71.44 ( <i>P</i> =0.014)   |
|                                             | norB      | 54.39±8.36    | 62.16±7.92                         | 56.58±13.41   | 59.76±8.46    | 64.60±13.68 ( <i>P</i> =0.023)    | 64.73±13.41 ( <i>P</i> =0.021)    |
|                                             | nirS      | 84.02±15.81   | 89.75±11.60                        | 84.83±22.27   | 93.35±14.45   | 97.80±22.50 ( <i>P</i> =0.070)    | 94.16±24.30 ( <i>P</i> =0.180)    |
|                                             | nirK      | 200.10±31.21  | 223.61±24.43                       | 208.58±49.32  | 233.06±41.37  | 246.72±56.05 ( <i>P</i> =0.014)   | 244.15±67.15 ( <i>P</i> =0.020)   |
|                                             | narG      | 33.42±5.87    | 35.41±3.68                         | 33.40±7.35    | 35.62±3.75    | 35.35±6.33                        | 35.96±6.57                        |
| Dissimilarory N<br>reduction to<br>ammonium | napA      | 57.26±6.42    | 60.49±8.26                         | 55.39±10.82   | 57.37±8.08    | 63.60±12.80                       | 62.86±13.21                       |
|                                             | nifA      | 91.79±14.32   | 98.93±11.78                        | 90.77±22.45   | 100.95±16.61  | 103.66±25.22                      | 101.70±23.31                      |
| Ammonification                              | ureC      | 414.38±65.04  | 420.75±45.89                       | 403.54±87.10  | 439.11±60.98  | 447.83±92.62                      | 449.66±84.60                      |
|                                             | gdh       | 374.03±40.28  | 431.62±49.96<br>( <i>P</i> =0.049) | 380.54±65.89  | 422.63±73.81  | 437.01±101.39 ( <i>P</i> =0.032)  | 428.38±89.65 ( <i>P</i> =0.063)   |
| Assimilatory N<br>reduction                 | NirB      | 174.24±25.23  | 198.55±24.76                       | 183.64±44.50  | 205.37±39.34  | 218.33±52.38 ( <i>P</i> =0.010)   | 219.67±57.85 ( <i>P</i> =0.008)   |
|                                             | nirA      | 165.93±27.17  | 179.39±24.70                       | 166.54±41.70  | 190.52±33.95  | 199.56±50.66 ( <i>P</i> =0.032)   | 195.80±48.77 ( <i>P</i> =0.055)   |
|                                             | NirR      | 176.38±28.04  | 192.18±25.55                       | 177.43±44.06  | 201.06±33.98  | 212.77±52.90 ( <i>P</i> =0.026)   | 208.23±51.79 ( <i>P</i> =0.051)   |
|                                             | nasA      | 34.58±6.97    | 35.93±3.75                         | 34.42±8.04    | 37.98±5.41    | 35.73±7.74                        | 38.34±6.94                        |

|                           |                       |               |               |               |               |                                 |                                  |
|---------------------------|-----------------------|---------------|---------------|---------------|---------------|---------------------------------|----------------------------------|
| Anammox                   | hzo                   | 69.02±8.80    | 78.26±11.90   | 68.35±15.06   | 73.34±14.28   | 86.16±19.14 ( <i>P</i> =0.004)  | 81.15±17.19 ( <i>P</i> =0.040)   |
| <b>Carbon cycling</b>     | AmyA                  | 2811.01±375.5 | 3028.88±409.2 | 2764.56±385.2 | 3109.61±651.6 | 2997.04±787.3                   | 3049.70±609.50                   |
| Starch degradation        | pulA                  | 125.61±12.60  | 136.13±15.33  | 125.65±19.57  | 137.88±19.09  | 138.95±29.80                    | 140.86±30.13 ( <i>P</i> =0.083)  |
| Hemicellulose degradation | ara                   | 290.19±34.56  | 310.25±39.96  | 285.30±57.89  | 320.63±44.59  | 329.95±70.36 ( <i>P</i> =0.065) | 323.23±67.22                     |
|                           | Mannanase             | 142.17±28.22  | 145.40±17.01  | 145.06±37.26  | 153.86±22.03  | 161.88±39.85                    | 163.46±35.24 ( <i>P</i> =0.085)  |
|                           | xylanase              | 32.58±5.25    | 35.09±4.08    | 32.06±7.39    | 37.40±6.82    | 37.48±8.39 ( <i>P</i> =0.092)   | 38.99±10.28 ( <i>P</i> =0.028)   |
|                           | xylA                  | 80.92±13.50   | 87.83±13.13   | 78.87±18.41   | 91.65±19.71   | 92.49±21.92                     | 94.08±24.95 ( <i>P</i> =0.083)   |
| Cellulose degradation     | Endoglucanase         | 151.93±21.53  | 156.41±20.62  | 149.15±30.07  | 163.77±24.87  | 172.01±36.26 ( <i>P</i> =0.082) | 166.82±36.62                     |
|                           | Exoglucanase          | 42.96±8.87    | 46.53±7.95    | 44.40±13.82   | 50.16±10.62   | 52.67±13.53 ( <i>P</i> =0.047)  | 51.77±16.44 ( <i>P</i> =0.071)   |
| Chitin degradation        | Exochitinase          | 28.22±3.77    | 30.54±3.73    | 28.86±5.96    | 31.57±4.02    | 33.54±5.98 ( <i>P</i> =0.011)   | 32.03±6.90 ( <i>P</i> =0.067)    |
|                           | Acetylglucosaminidase | 400.14±62.66  | 425.35±70.70  | 386.16±90.39  | 438.70±74.67  | 442.31±100.10                   | 460.30±119.25 ( <i>P</i> =0.087) |
|                           | Endochitinase         | 211.30±29.16  | 221.87±22.66  | 209.09±38.81  | 234.94±31.13  | 232.07±43.96                    | 234.57±44.92                     |
| Aromatics degradation     | vdh                   | 35.67±4.03    | 38.80±5.38    | 35.60±8.26    | 39.50±5.65    | 42.60±9.48 ( <i>P</i> =0.018)   | 40.68±9.07 ( <i>P</i> =0.084)    |
|                           | vanA                  | 191.97±27.03  | 199.41±25.64  | 187.96±40.02  | 212.12±31.99  | 215.69±41.85 ( <i>P</i> =0.091) | 213.65±41.63                     |
| Lignin degradation        | Phenol oxidase        | 193.93±23.51  | 200.03±19.45  | 193.03±38.17  | 209.88±28.79  | 216.10±44.17                    | 213.38±40.38                     |
|                           | mnp                   | 22.77±4.07    | 24.49±2.50    | 22.62±4.65    | 25.38±3.86    | 25.51±5.00                      | 24.54±5.82                       |
| Carbon fixation           | pcc                   | 397.02±63.82  | 420.52±62.30  | 392.57±91.78  | 455.61±86.79  | 452.79±102.02                   | 462.47±105.56 ( <i>P</i> =0.059) |
|                           | Rubisco               | 173.54±23.69  | 188.13±27.03  | 169.95±34.14  | 190.12±33.73  | 198.40±45.13 ( <i>P</i> =0.084) | 192.92±47.36                     |
|                           | FTHFS                 | 233.40±32.40  | 257.34±34.45  | 228.10±49.67  | 263.59±41.15  | 276.88±63.76 ( <i>P</i> =0.027) | 269.80±63.53 ( <i>P</i> =0.063)  |
| Methane metabolism        | pmoA                  | 33.70±4.26    | 38.50±5.56    | 33.20±7.98    | 39.57±7.15    | 40.79±10.03 ( <i>P</i> =0.024)  | 40.80±10.29 ( <i>P</i> =0.024)   |
|                           | mcrA                  | 56.94±15.29   | 61.34±13.56   | 59.81±20.43   | 72.95±21.91   | 74.99±25.05 ( <i>P</i> =0.033)  | 75.10±27.35 ( <i>P</i> =0.032)   |

**Table S5.** Pearson correlation between plant and bacterial alpha diversity and individual environmental factors.

| Environmental Factors           | Plant Shannon Index |          | Bacteria Shannon Index |          |
|---------------------------------|---------------------|----------|------------------------|----------|
|                                 | <i>r</i>            | <i>P</i> | <i>r</i>               | <i>P</i> |
| Site Elevation                  | 0.128               | 0.265    | -0.532                 | < 0.001  |
| Mean annual temperature         | -0.081              | 0.483    | 0.549                  | < 0.001  |
| Mean annual precipitation       | 0.109               | 0.343    | -0.471                 | < 0.001  |
| Soil moisture                   | 0.188               | 0.099    | -0.464                 | < 0.001  |
| Soil pH                         | -0.097              | 0.399    | 0.477                  | < 0.001  |
| Soil organic carbon             | 0.082               | 0.476    | -0.469                 | < 0.001  |
| Soil total nitrogen             | 0.115               | 0.316    | -0.445                 | < 0.001  |
| Soil total phosphorus           | -0.009              | 0.936    | -0.353                 | 0.002    |
| Soil available nitrogen         | 0.116               | 0.314    | -0.449                 | < 0.001  |
| Rapid available phosphorus      | -0.001              | 0.992    | -0.278                 | 0.014    |
| NH <sub>4</sub> <sup>+</sup> -N | 0.001               | 0.992    | -0.304                 | 0.006    |
| NO <sub>3</sub> <sup>-</sup> -N | 0.152               | 0.183    | 0.086                  | 0.456    |
| Bacteria / Plant Shannon index  | -0.147              | 0.198    | -0.147                 | 0.198    |

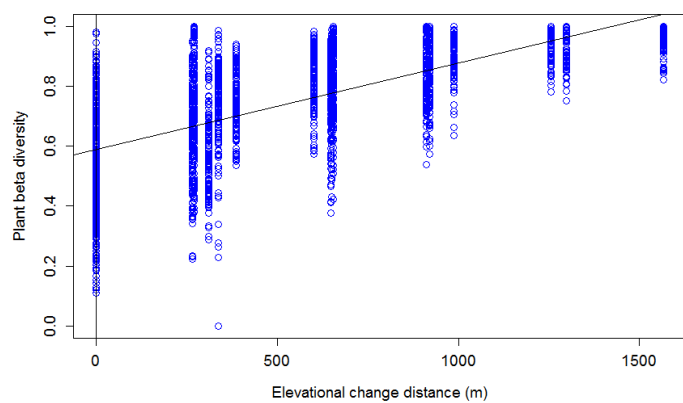

(a)

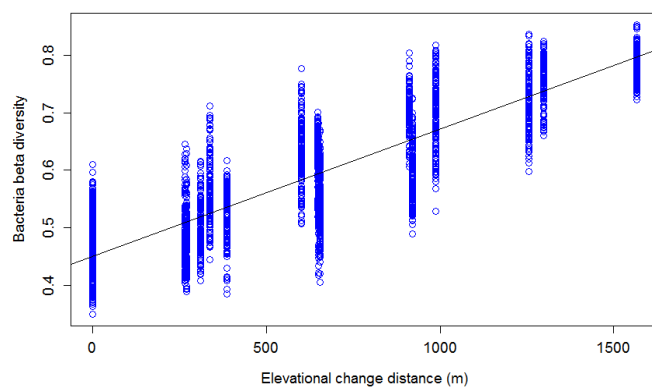

(b)

**Figure S1.** The relationships between plant beta diversity (a) ( $r = 0.696$ ,  $P = 0.001$ ) and soil bacterial beta diversity (b) ( $r = 0.865$ ,  $P = 0.001$ ) and change elevation distance.
